# Supplementary material
Source: PubMed Central journal article supplement (PMC10822714)

Pictorial representation of Figure 1: Summary of the main sources of exposure for the metals included in the review.

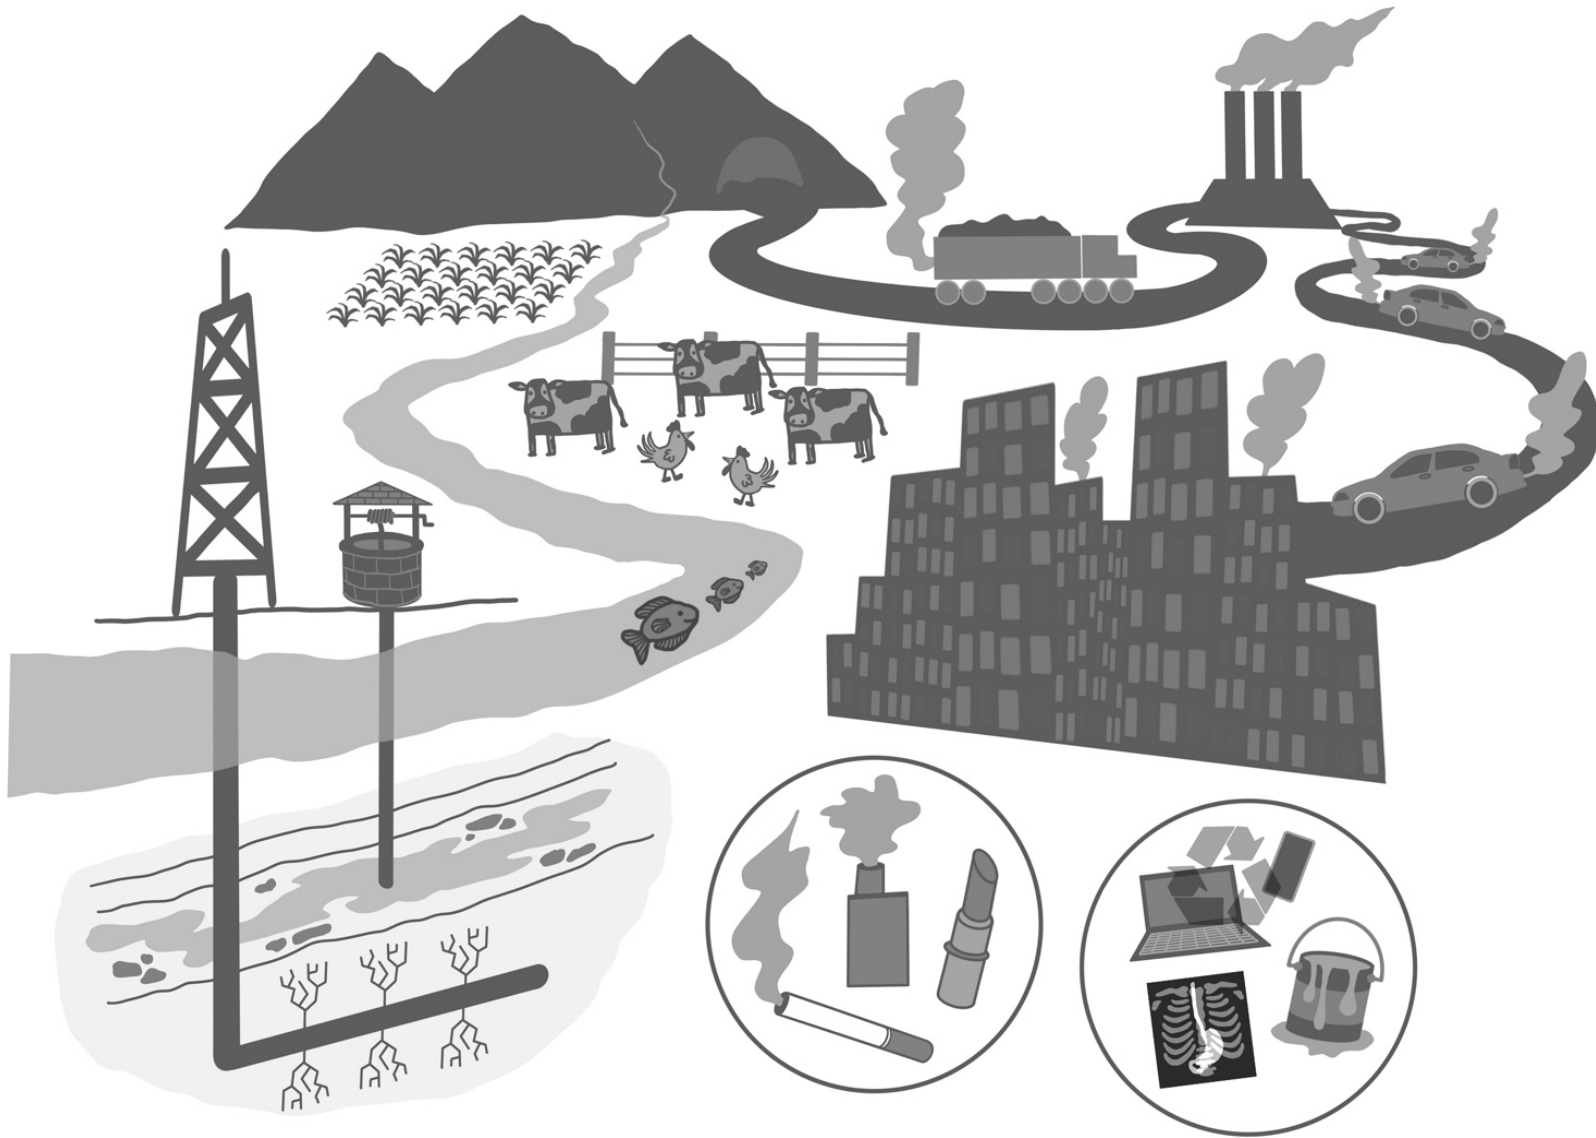

Supplement: NIHMS1935621-supplement-Supplementary_Figure_1.pdf [file NIHMS1935621-supplement-Supplementary_Figure_1.pdf]
